# Supplementary material for: Integration of magnetic resonance imaging and protein and metabolite CSF measurements to enable early diagnosis of secondary progressive multiple sclerosis
Source: PubMed Central journal article supplement — Theranostics. 2018 Aug 7;8(16):4477–90. doi: 10.7150/thno.26249 (PMC6134925; doi:10.7150/thno.26249), 2018-08-07
Supplement: thnov08p4477s1.pdf [file thnov08p4477s1.pdf]

# Supplementary information

## Integration of magnetic resonance imaging and protein and metabolite CSF measurements to enable early diagnosis of secondary progressive multiple sclerosis

Stephanie Herman, Payam Emami Khoonsari, Andreas Tolf, Julia Steinmetz, Henrik Zetterberg, Torbjörn Åkerfeldt, Per-Johan Jakobsson, Anders Larsson, Ola Spjuth, Joachim Burman and Kim

Kultima

### MRI studies

MRI was performed at 1.5 T using the same imager and imaging protocol in all examinations. Gadopentetate dimeglumine (Magnevist®, 0.4 ml/kg body weight, *i.e.* double dose) was used as a contrast agent. MR images were analyzed visually. In the brain, T2 lesions >3 mm in diameter were counted in fluid attenuated inversion recovery (FLAIR) images using T2-weighted and proton density-weighted spin echo images as an aid. To account for differences in lesion volume, a ‘T2 score’ was created by weighting T2 lesions >10mm by a factor of three. T1 and Gd+ lesions were also counted. Large T1 lesions with a diameter >10mm and isodense to CSF were counted separately. Furthermore, T2 and Gd+ lesions were also counted in the spinal cord.

The width of the third ventricle was measured in coronal images. The sizes of the lateral ventricles and peripheral CSF spaces were graded from one to five according to a method described previously. Anteroposterior diameters of the spinal cord were measured in the sagittal plane at *vertebrae* C2, C5, Th3 and Th6.

### Technical details of the MR examinations

#### *Brain*

Sagittal and transverse images were obtained with T2-weighted fluid attenuated inversion recovery sequences (FLAIR). Transverse and coronal images were acquired with T2-weighted turbo spin echo (SE) sequences. A transverse series was obtained with a proton density-weighted SE sequence. T1-weighted SE images were acquired in a transverse plane before contrast medium administration (gadopentetatedimeglumine, Magnevist®, 0.4 ml/kg body weight, *i.e.* double dose), and in transverse and coronal planes after that. Time between contrast medium injection and the first post-contrast T1-weighted series was about 10 min. The slice thickness was 5 mm and the interslice gap 0.5 mm in all image series of the brain.

**Table S1.** Technical data of the MRI of the brain.

|                                       | TR (ms) | TE (ms) | TI (ms) | Pixel size (mm) |
|---------------------------------------|---------|---------|---------|-----------------|
| <b>T2w FLAIR sagittal series</b>      | 9000    | 109     | 2500    | 0.9 x 0.9       |
| <b>T2wFLAIR transverse series</b>     | 9560    | 109     | 2500    | 0.9 x 0.9       |
| <b>T2w turbo SE transverse series</b> | 4000    | 98      | n/a     | 0.6 x 0.4       |
| <b>T2w turbo SE coronal series</b>    | 5590    | 112     | n/a     | 0.6 x 0.4       |
| <b>PDw SE transverse series</b>       | 2390    | 11      | n/a     | 0.7 x 0.6       |
| <b>T1w SE transverse series</b>       | 594     | 9.1     | n/a     | 0.8 x 0.6       |
| <b>T1w SE coronal series</b>          | 594     | 9.1     | n/a     | 1.0 x 0.9       |

T2w: T2-weighted; PDw: proton density weighted; T1w: T1-weighted; FLAIR: fluid attenuated inversion recovery; SE: spin echo; TR: repetition time; TE: time to echo; TI: time for inversion; n/a: not applicable.

### *Spinal cord*

All images of the spinal cord were acquired after the brain examination, i.e. no images of the spinal cord were obtained before contrast medium administration. Time from contrast medium injection to the first T1-weighted image series of the spinal cord was 20-25 min. T1-weighted SE and T2-weighted turbo SE sagittal series were obtained first of the cervical and then of the thoracic part of the spinal cord using a slice thickness of 4 mm, an interslice gap of 0.4 mm. Transverse slices (slice thickness/interslice gap 3.0/0.3 mm) with a T1-weighted SE sequence and a T2-weighted turbo SE sequence were taken if local abnormalities were suspected in the sagittal images.

**Table S2.** Technical data of the MRI of the spinal cord.

|                                                | TR (ms) | TE (ms) | Pixel size (mm) |
|------------------------------------------------|---------|---------|-----------------|
| <b>T1w SE sagittal series</b>                  | 500     | 14      | 1.3 x 1.3       |
| <b>T2w turbo SE sagittal series</b>            | 4000    | 98      | 1.3 x 1.3       |
| <b>T1w SE transverse series</b>                | 254     | 10      | 1.0 x 0.8       |
| <b>T2w turbo SE transverse cervical series</b> | 3800    | 122     | 0.8 x 0.6       |
| <b>T2w turbo SE transverse thoracal series</b> | 5030    | 122     | 0.8 x 0.6       |

T1w: T1-weighted; T2w: T2-weighted; SE: spin echo; TR: repetition time; TE: time to echo.

**Table S3.** Stratification of ongoing treatments.

| <i>Treatments</i>     | <b>None</b> | <b>GLA</b> | <b>IFN</b> | <b>IVIG</b> | <b>MTX</b> | <b>NZB</b> |
|-----------------------|-------------|------------|------------|-------------|------------|------------|
| <b>RRMS, <i>n</i></b> | 15          | 5          | 4          | 3           | 1          | 2          |
| <b>SPMS, <i>n</i></b> | 15          | 0          | 0          | 0           | 0          | 1          |

GLA: Glatiramer acetate; NZB: Natalizumab; IFN: Interferon beta; IVIG: Intravenous IgG; MTX: Mitoxantrone.

**Table S4.** A summary of the clinical, radiological and protein measurements. Four of the RRMS patients had transitioned and have therefore been excluded from the RRMS group.

| <b>CRP variable</b>             | <b>Control mean(SD)</b> | <b>RRMS mean(SD)</b> | <b>SPMS mean(SD)</b> |
|---------------------------------|-------------------------|----------------------|----------------------|
| <b>GFAP</b>                     | 204(110.2)              | 254(163.9)           | 593(824.9)           |
| <b>sAPP-<math>\alpha</math></b> | 665(247)                | 649(228)             | 579(218)             |
| <b>sAPP-<math>\beta</math></b>  | 204(62.0)               | 187(72.1)            | 183(61.6)            |
| <b>Ab38</b>                     | 1440(588)               | 1355(542)            | 1315(376)            |
| <b>Ab40</b>                     | 10687(4698)             | 9887(4039)           | 9386(2677)           |
| <b>Ab42</b>                     | 1052(385)               | 944(343)             | 875(243)             |
| <b>Tau</b>                      | 226(94.4)               | 244(159.1)           | 208(58.9)            |
| <b>pTau</b>                     | 38.8(14.5)              | 32(9.3)              | 31.8(7.8)            |
| <b>Am</b>                       | 795.1(222.6)            | 719(176.7)           | 697.8(125.2)         |
| <b>MCP-1</b>                    | 511.6(125.3)            | 399.8(145.3)         | 540.3(154.4)         |
| <b>YKL40</b>                    | 74551(24302)            | 112217(78238)        | 145205(65667)        |
| <b>NFL</b>                      | 650(908)                | 2394(6061)           | 1111(728)            |
| <b>MBP</b>                      | 0.5(0.2)                | 0.7(0.7)             | 0.7(0.2)             |
| <b>sCD14</b>                    | 67542(24649)            | 72814(26128)         | 82950(18673)         |
| <b>sCD27</b>                    | 95.9(280)               | 525(689)             | 381(403)             |
| <b>T1</b>                       | -                       | 7(9)                 | 15.2(9.6)            |
| <b>largeT1</b>                  | -                       | 0.2(0.5)             | 1.9(2.9)             |
| <b>TotalT1</b>                  | -                       | 7.3(9.4)             | 17.1(11.1)           |
| <b>TotalGd</b>                  | -                       | 4.4(14.6)            | 0.3(0.8)             |
| <b>TotalT2</b>                  | -                       | 25.6(27.6)           | 34.5(16.7)           |
| <b>T2score</b>                  | -                       | 31(37.4)             | 42.4(23)             |
| <b>Size_ventricle</b>           | -                       | 5.8(1.9)             | 10.1(3.5)            |
| <b>Size_spinal cord</b>         | -                       | 28(1.9)              | 24.4(2.1)            |

|                                  |                |                |                |
|----------------------------------|----------------|----------------|----------------|
| <b>FGF-2</b>                     | 7.4(3.4)       | 10.5(4.7)      | 8.1(3.2)       |
| <b>Eotaxin</b>                   | 9.1(7.5)       | 9.8(6.7)       | 5.3(5)         |
| <b>TGF-<math>\alpha</math></b>   | 5.3(0.9)       | 5.3(1.1)       | 4.4(0.9)       |
| <b>FLT-3L</b>                    | 30.6(5.6)      | 28(6.4)        | 29.3(5.5)      |
| <b>Fractalkine</b>               | 71.8(9.4)      | 71(9.4)        | 66.2(8.2)      |
| <b>GRO</b>                       | 19.9(3.3)      | 30.6(14.2)     | 26.1(7.6)      |
| <b>MCP-3</b>                     | 4.3(1.3)       | 5.4(2.3)       | 4.8(1.7)       |
| <b>MDC</b>                       | 20.3(4.7)      | 86.6(147)      | 27(8.4)        |
| <b>PDGF-AA</b>                   | 3.9(1.2)       | 3.9(2.1)       | 2.6(0.5)       |
| <b>PDGF-BB</b>                   | 2.1(1.8)       | 2.1(1.2)       | 2.4(1.6)       |
| <b>sCD40L</b>                    | 11.2(3.9)      | 20.5(12.1)     | 12.8(4.2)      |
| <b>IP-10</b>                     | 726(291)       | 1462(1233)     | 1188(508)      |
| <b>MIP-1-<math>\alpha</math></b> | 3.4(0.6)       | 4.3(3.1)       | 4.1(2.2)       |
| <b>MIP-1-<math>\beta</math></b>  | 5(1.8)         | 6.4(2.9)       | 4.9(2.5)       |
| <b>RANTES</b>                    | 1.8(0.2)       | 3.3(2.3)       | 3.1(1.8)       |
| <b>VEGF</b>                      | 16(5.9)        | 18.2(11)       | 22.3(11.6)     |
| <b>IL-17F</b>                    | 0.0026(0.0025) | 0.0035(0.0022) | 0.0046(0.0024) |
| <b>IL-10</b>                     | 1(0.5)         | 1.1(1.3)       | 1(0.3)         |
| <b>IL-12p70</b>                  | 0.7(0.6)       | 0.8(0.6)       | 0.7(0.4)       |
| <b>IL-9</b>                      | 2.8(0.5)       | 2.6(0.9)       | 2.8(0.9)       |
| <b>IL-23</b>                     | 0.027(0.037)   | 0.046(0.033)   | 0.043(0.044)   |
| <b>IL-5</b>                      | 0.3(0.1)       | 0.5(0.5)       | 0.7(0.6)       |
| <b>IL-6</b>                      | 1.4(0.9)       | 1.1(1)         | 1.1(1)         |
| <b>TNF-<math>\alpha</math></b>   | 0.5(0.6)       | 1.2(0.9)       | 1.7(0.8)       |
| <b>IL-28A</b>                    | 0.0095(0.0054) | 0.0099(0.0073) | 0.0136(0.0062) |
| <b>Galectin-9</b>                | 293(76.3)      | 293(66.4)      | 380(70.9)      |

**Table S5.** Non-default parameter values used for pre-processing in OpenMS. For all parameters not mentioned, the default values were used.

| Parameter                       | Value                |
|---------------------------------|----------------------|
| <b>Positive ion mode</b>        |                      |
| <i>FeatureFinderMetabo</i>      |                      |
| noise_threshold_int             | 2500                 |
| mass_error_ppm                  | 3.0                  |
| trace_termination_outliers      | 3                    |
| min_sample_rate                 | 0.7                  |
| min_trace_length                | 3.0                  |
| max_trace_length                | 35.0                 |
| width_filtering                 | auto                 |
| local_rt_range                  | 3.0                  |
| local_mz_range                  | 11.0                 |
| charge_upper_bound              | 10                   |
| enable_RT_filtering             | false                |
| isotope_filtering_model         | metabolites (2% RMS) |
| use_smoothed_intensities        | false                |
| report_convex_hulls             | true                 |
| <i>FeatureLinkerUnlabeledQT</i> |                      |
| ignore_charge                   | true                 |
| max_difference (distance_RT)    | 10.0                 |
| max_difference (distance_MZ)    | 5.0                  |
| unit                            | ppm                  |
| <b>Negative ion mode</b>        |                      |
| <i>FeatureFinderMetabo</i>      |                      |
| noise_threshold_int             | 2500                 |
| mass_error_ppm                  | 3.0                  |
| trace_termination_criterion     | sample_rate          |
| trace_termination_outliers      | 3                    |
| min_sample_rate                 | 0.7                  |
| min_trace_length                | 3.0                  |

|                                 |       |
|---------------------------------|-------|
| max_trace_length                | 35.0  |
| width_filtering                 | auto  |
| local_rt_range                  | 3.0   |
| local_mz_range                  | 11.0  |
| charge_upper_bound              | 10    |
| enable_RT_filtering             | false |
| use_smoothed_intensities        | false |
| report_convex_hulls             | true  |
| <i>FeatureLinkerUnlabeledQT</i> |       |
| ignore_charge                   | true  |
| max_difference (distance_RT)    | 10.0  |
| max_difference (distance_MZ)    | 5.0   |
| unit                            | ppm   |

**Table S6.** The change in EDSS after the follow-up period in the SPMS patients and the stratification of the three groups of clinical degree of change.

| SPMS patient | EDSS at sample<br>collection | EDSS after<br>follow-up | $\Delta$ EDSS | Clinical degree<br>of change |
|--------------|------------------------------|-------------------------|---------------|------------------------------|
| 1            | 6                            | 6                       | 0             | 1                            |
| 2            | 6                            | 6                       | 0             | 1                            |
| 3            | 3                            | 3                       | 0             | 1                            |
| 4            | 7.5                          | 8                       | 0.5           | 2                            |
| 5            | 5                            | 6                       | 1             | 2                            |
| 6            | 4                            | 5.5                     | 1.5           | 2                            |
| 7            | 5                            | 6                       | 1             | 2                            |
| 8            | 6                            | 8                       | 2             | 3                            |
| 9            | 4.5                          | 7                       | 2.5           | 3                            |
| 10           | 3                            | 6.5                     | 3.5           | 3                            |
| 11           | 3                            | 7                       | 4             | 3                            |
| 12           | 3.5                          | 6                       | 2.5           | 3                            |
| 13           | 6.5                          | 8.5                     | 2             | 3                            |

**Table S7.** Identities of the seven most frequently chosen metabolic features from the metabolomics models. Four of the features were not successfully identified.

| Code name | Identified as                   | Class   | Identifier | m/z      |
|-----------|---------------------------------|---------|------------|----------|
| X1        | Not identified                  | -       | -          | 416.2285 |
| X2        | Not identified                  | -       | -          | 174.1238 |
| X3        | Not identified                  | -       | -          | 416.1671 |
| X4        | Not identified                  | -       | -          | 321.1661 |
| X5        | Indolepyruvate*                 | Indole  | HMDB60484  | 221.0922 |
| X6        | 5,6-dihydroxyprostaglandin F1a* | Lipid   | HMDB12109  | 409.2230 |
| X7        | 20 $\beta$ -dihydrocortisol**   | Steroid | -          | 365.2329 |

\*\*Supported by two identification methods

\* Supported by one identification method

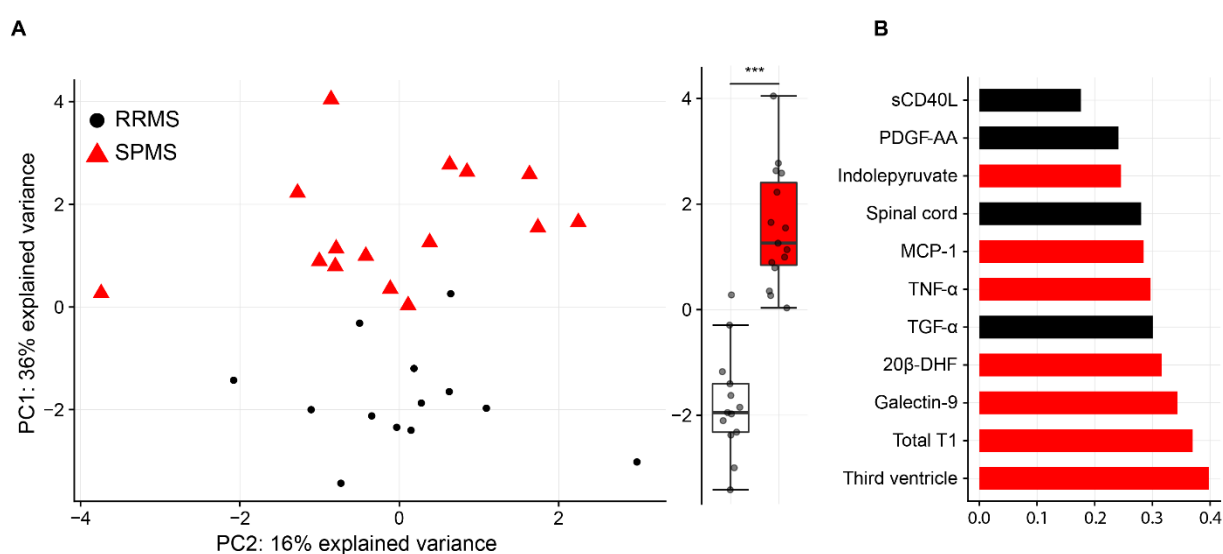

**Figure S1.** Principal component analysis of the CRPM dataset, excluding all patients with ongoing treatments and transitioning patients. **(A)** PCA of the eleven variables extracted by the variable selection procedure and the distribution of the first principal component to the right displaying a highly significant difference ( $p = 8.1 \times 10^{-9}$ ). **(B)** The absolute loadings for the first principal component, colored by the group with the highest mean abundance (*black*: RRMS, *red*: SPMS).

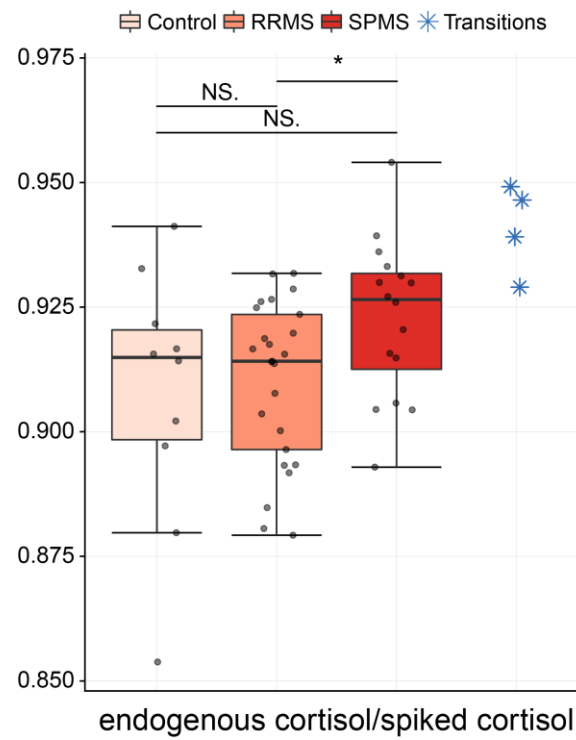

**Figure S2.** Endogenous cortisol levels normalized with the spiked in cortisol. Statistically significant increased levels can be seen in SPMS compared to RRMS.
